# Supplementary material
Source: PubMed Central journal article supplement (PMC5606003)
Supplement: blood757930-suppl1.pdf [file blood757930-suppl1.pdf]

**LABORATORY PREDICTORS OF BLEEDING, AND EFFECT OF PLATELET AND  
RBC TRANSFUSIONS ON BLEEDING OUTCOMES, IN THE PLADO TRIAL**

Lynne Uhl<sup>1,2</sup>, Susan F. Assmann<sup>3</sup>, Taye H. Hamza<sup>3</sup>, Ryan W. Harrison<sup>4</sup>, Terry  
Gernsheimer<sup>5,6,7</sup> and Sherrill J. Slichter<sup>5,6,7</sup>

---

<sup>1</sup>Harvard Medical School, Boston, MA; <sup>2</sup>Beth Israel Deaconess Medical Center, Boston, MA; <sup>3</sup>New England Research Institutes, Watertown, MA; <sup>4</sup>Corrona LLC, Southborough, MA; <sup>5</sup>University of Washington School of Medicine, Seattle, WA; <sup>6</sup>Seattle Cancer Care Alliance, Seattle, WA; and <sup>7</sup>Bloodworks Northwest, Seattle, WA

**Supplemental Table 1.** Definitions of WHO bleeding grades.

|                                           | Grade 1                                                                                                                                                                                                                                                                                                                            | Grade 2                                                                                                                                                                                                                                                                                                                             | Grade 3                                                                                                                     |
|-------------------------------------------|------------------------------------------------------------------------------------------------------------------------------------------------------------------------------------------------------------------------------------------------------------------------------------------------------------------------------------|-------------------------------------------------------------------------------------------------------------------------------------------------------------------------------------------------------------------------------------------------------------------------------------------------------------------------------------|-----------------------------------------------------------------------------------------------------------------------------|
| <b>Oral and nasal</b>                     | <ul style="list-style-type: none"> <li>➤ Oropharyngeal bleeding – total duration of all episodes in previous 24 hours <math>\leq</math> 30 minutes*</li> <li>➤ Petechiae of oral mucosa</li> <li>➤ Epistaxis – total duration of all episodes in previous 24 hours <math>\leq</math> 30 minutes*</li> </ul>                        | <ul style="list-style-type: none"> <li>➤ Oropharyngeal bleeding – total duration of all episodes in previous 24 hours <math>&gt;</math> 30 minutes*</li> <li>➤ Epistaxis – total duration of all episodes in previous 24 hours <math>&gt;</math> 30 minutes*</li> </ul>                                                             | <ul style="list-style-type: none"> <li>➤ Any bleeding requiring RBC transfusion over routine transfusion needs**</li> </ul> |
| <b>Skin, soft tissue, musculoskeletal</b> | <ul style="list-style-type: none"> <li>➤ Petechiae of skin</li> <li>➤ Purpura <math>\leq</math> 1 inch diameter</li> <li>➤ One or more spontaneous hematomas in the soft tissue or muscle <math>&gt;</math> 1"</li> </ul>                                                                                                          | <ul style="list-style-type: none"> <li>➤ Purpura <math>&gt;</math> 1 inch diameter</li> <li>➤ Spontaneous hematoma in deeper tissues</li> <li>➤ Joint bleeding (confirmed by aspiration, imaging study or other accepted technique)</li> </ul>                                                                                      | <ul style="list-style-type: none"> <li>➤ Any bleeding requiring RBC transfusion over routine transfusion needs**</li> </ul> |
| <b>Gastrointestinal</b>                   | <ul style="list-style-type: none"> <li>➤ Positive stool occult blood test</li> </ul>                                                                                                                                                                                                                                               | <ul style="list-style-type: none"> <li>➤ Melanotic stool</li> <li>➤ Hematochezia – visible red blood mixed in stool, not requiring a transfusion</li> <li>➤ Hematemesis – Grossly visible blood in emesis or in nasogastric drainage tube (not related or secondary to swallowed blood)</li> </ul>                                  | <ul style="list-style-type: none"> <li>➤ Any bleeding requiring RBC transfusion over routine transfusion needs**</li> </ul> |
| <b>Genitourinary</b>                      | <ul style="list-style-type: none"> <li>➤ Any biochemical or microscopic Hb/RBCs without red urine</li> <li>➤ Abnormal vaginal bleeding (Unexpected bleeding out of normal cycle <b>OR</b> Bleeding heavier than normal <b>OR</b> Breakthrough bleeding (patient on hormonal therapy to prevent bleeding)) with spotting</li> </ul> | <ul style="list-style-type: none"> <li>➤ Gross/visible hematuria without need for transfusion</li> <li>➤ Abnormal vaginal bleeding (Unexpected bleeding out of normal cycle <b>OR</b> Bleeding heavier than normal <b>OR</b> Breakthrough bleeding (patient on hormonal therapy to prevent bleeding)) more than spotting</li> </ul> | <ul style="list-style-type: none"> <li>➤ Any bleeding requiring RBC transfusion over routine transfusion needs**</li> </ul> |
| <b>Pulmonary</b>                          |                                                                                                                                                                                                                                                                                                                                    | <ul style="list-style-type: none"> <li>➤ Hemoptysis – Visible blood</li> <li>➤ Blood in broncho-pulmonary lavage, or blood tinged sputum (excluding those with nose or oropharyngeal bleeding)</li> </ul>                                                                                                                           | <ul style="list-style-type: none"> <li>➤ Any bleeding requiring RBC transfusion over routine transfusion needs**</li> </ul> |

Continued on next page

Supplemental Table 1, Continued

|                                | Grade 1 | Grade 2                                                                                                                                                                                                                                        | Grade 3                                                                                                                                                                                                                                                                            |
|--------------------------------|---------|------------------------------------------------------------------------------------------------------------------------------------------------------------------------------------------------------------------------------------------------|------------------------------------------------------------------------------------------------------------------------------------------------------------------------------------------------------------------------------------------------------------------------------------|
| <b>Body Cavity</b>             |         | <ul style="list-style-type: none"> <li>➤ Visible blood in body cavity fluid (e.g. red cells apparent in fluid aspirate) short of criteria for Grade 3 or 4</li> </ul>                                                                          | <ul style="list-style-type: none"> <li>➤ Grossly bloody body cavity fluids and organ dysfunction with symptoms, and/or need to intervene (e.g. to aspirate), and/or need for transfusion</li> </ul>                                                                                |
| <b>Central Nervous System</b>  |         | <ul style="list-style-type: none"> <li>➤ Retinal bleeding without visual impairment</li> <li>➤ Lumbar puncture with blood (&gt;5 RBC/μL in CSF on microscopic analysis and non-traumatic tap), no symptoms and no visible red color</li> </ul> | <ul style="list-style-type: none"> <li>➤ Lumbar puncture with visible red color in absence of symptoms, and non-traumatic tap</li> </ul>                                                                                                                                           |
| <b>Invasive Sites</b>          |         | <ul style="list-style-type: none"> <li>➤ Bleeding at invasive sites (venipuncture sites, intravenous lines or catheter exit sites): active oozing at site for a cumulative total of &gt; 1 hour in the previous 24 hours</li> </ul>            | <ul style="list-style-type: none"> <li>➤ Any bleeding requiring RBC transfusion over routine transfusion needs**</li> </ul>                                                                                                                                                        |
| <b>Hemodynamic Instability</b> |         |                                                                                                                                                                                                                                                | <ul style="list-style-type: none"> <li>➤ Any bleeding associated with moderate hemodynamic instability (hypotension; &gt;30mmHg fall or &gt;30% decrease in either systolic or diastolic blood pressure) and requiring RBC transfusion over routine transfusion needs**</li> </ul> |

\*Count actual bleeding (i.e. "running out" or need for basin, Kleenex, towel, etc.) not minor bleeding

\*\*Red cell transfusion must be specifically related to treatment of bleeding within 24 hours of onset of bleeding

Continued on next page

**Supplemental Table 1**, continued**GRADE 2A:** Grade 2 bleeding not due solely to purpura > 1 inch in diameter**GRADE 4:**

- ◆ Any bleeding associated with severe hemodynamic instability (hypotension; >50mm/Hg fall or >50% decrease in either systolic or diastolic blood pressure, with associated tachycardia (heart rate increase of  $\geq 20\%$  for 20 minutes) and requiring RBC transfusion over routine transfusion needs
- ◆ Fatal bleeding from any source
- ◆ Retinal bleeding with visual impairment (Visual impairment is defined as a field deficit, and patients with suspected visual impairment require an ophthalmologic consult for documentation)
- ◆ CNS symptoms with non-traumatic bloody lumbar puncture
- ◆ CNS bleeding on imaging study with or without dysfunction
